# Supplementary material for: Lung SORT LNPs enable precise homology-directed repair mediated CRISPR/Cas genome correction in cystic fibrosis models
Source: PubMed Central journal article supplement (PMC10640563; doi:10.1038/s41467-023-42948-2), 2023-11-11
Supplement: 41467_2023_42948_MOESM2_ESM.pdf [file 41467_2023_42948_MOESM2_ESM.pdf]

## Reporting Summary

Nature Portfolio wishes to improve the reproducibility of the work that we publish. This form provides structure for consistency and transparency in reporting. For further information on Nature Portfolio policies, see our [Editorial Policies](#) and the [Editorial Policy Checklist](#).

### Statistics

For all statistical analyses, confirm that the following items are present in the figure legend, table legend, main text, or Methods section.

- |     |                                                                                                                                                                                                                                                                                                                                                                                                                                                                                                                                                                                                                                                                                                                                                                                                                                                                                                                                                                                                                                                                                                                                                                                                                                                                                                                                                                                                                                                                                                                                                                                                                                                                                                                                                                                                                                                                                                                                                              |
|-----|--------------------------------------------------------------------------------------------------------------------------------------------------------------------------------------------------------------------------------------------------------------------------------------------------------------------------------------------------------------------------------------------------------------------------------------------------------------------------------------------------------------------------------------------------------------------------------------------------------------------------------------------------------------------------------------------------------------------------------------------------------------------------------------------------------------------------------------------------------------------------------------------------------------------------------------------------------------------------------------------------------------------------------------------------------------------------------------------------------------------------------------------------------------------------------------------------------------------------------------------------------------------------------------------------------------------------------------------------------------------------------------------------------------------------------------------------------------------------------------------------------------------------------------------------------------------------------------------------------------------------------------------------------------------------------------------------------------------------------------------------------------------------------------------------------------------------------------------------------------------------------------------------------------------------------------------------------------|
| n/a | <p><input type="checkbox"/> Confirmed</p> <p><input checked="" type="checkbox"/> The exact sample size (<math>n</math>) for each experimental group/condition, given as a discrete number and unit of measurement</p> <p><input checked="" type="checkbox"/> A statement on whether measurements were taken from distinct samples or whether the same sample was measured repeatedly</p> <p><input type="checkbox"/> The statistical test(s) used AND whether they are one- or two-sided<br/><i>Only common tests should be described solely by name; describe more complex techniques in the Methods section.</i></p> <p><input checked="" type="checkbox"/> A description of all covariates tested</p> <p><input checked="" type="checkbox"/> A description of any assumptions or corrections, such as tests of normality and adjustment for multiple comparisons</p> <p><input type="checkbox"/> A full description of the statistical parameters including central tendency (e.g. means) or other basic estimates (e.g. regression coefficient) AND variation (e.g. standard deviation) or associated estimates of uncertainty (e.g. confidence intervals)</p> <p><input type="checkbox"/> For null hypothesis testing, the test statistic (e.g. <math>F</math>, <math>t</math>, <math>r</math>) with confidence intervals, effect sizes, degrees of freedom and <math>P</math> value noted<br/><i>Give <math>P</math> values as exact values whenever suitable.</i></p> <p><input checked="" type="checkbox"/> For Bayesian analysis, information on the choice of priors and Markov chain Monte Carlo settings</p> <p><input checked="" type="checkbox"/> For hierarchical and complex designs, identification of the appropriate level for tests and full reporting of outcomes</p> <p><input checked="" type="checkbox"/> Estimates of effect sizes (e.g. Cohen's <math>d</math>, Pearson's <math>r</math>), indicating how they were calculated</p> |
|-----|--------------------------------------------------------------------------------------------------------------------------------------------------------------------------------------------------------------------------------------------------------------------------------------------------------------------------------------------------------------------------------------------------------------------------------------------------------------------------------------------------------------------------------------------------------------------------------------------------------------------------------------------------------------------------------------------------------------------------------------------------------------------------------------------------------------------------------------------------------------------------------------------------------------------------------------------------------------------------------------------------------------------------------------------------------------------------------------------------------------------------------------------------------------------------------------------------------------------------------------------------------------------------------------------------------------------------------------------------------------------------------------------------------------------------------------------------------------------------------------------------------------------------------------------------------------------------------------------------------------------------------------------------------------------------------------------------------------------------------------------------------------------------------------------------------------------------------------------------------------------------------------------------------------------------------------------------------------|

*Our web collection on [statistics for biologists](#) contains articles on many of the points above.*

### Software and code

Policy information about [availability of computer code](#)

|                 |                                                                                                                                                                                                                                                                                                                                                                                                                                                                                                                                                                                                                                                                                                                                                                                                               |
|-----------------|---------------------------------------------------------------------------------------------------------------------------------------------------------------------------------------------------------------------------------------------------------------------------------------------------------------------------------------------------------------------------------------------------------------------------------------------------------------------------------------------------------------------------------------------------------------------------------------------------------------------------------------------------------------------------------------------------------------------------------------------------------------------------------------------------------------|
| Data collection | <p>Zetasizer software version 7.13 (Malvern Panalytical)</p> <p>Living Image software version 4.3 (64-bit, Caliper Life Sciences)</p> <p>Aura software v.4.0.7 (Spectral Instruments Imaging)</p> <p>BD FACSDiva software version 8.0.1 (BD LSRFortessa)</p> <p>BZ-X Viewer software version 1.0.0 (KEYENCE Corporation)</p> <p>ZEN x64 software version 1.1.0 (Carl Zeiss Microscopy GmbH)</p> <p>NDP.scan software version 3.1.9 (NANOZOOMER, Hamamatsu)</p>                                                                                                                                                                                                                                                                                                                                                |
| Data analysis   | <p>GraphPad Prism 9.5.1 (GraphPad Software)</p> <p>Aura software v.4.0.7 (Spectral Instruments Imaging)</p> <p>Living Image software version 4.3 (Caliper Life Sciences)</p> <p>TIDER Analysis tool (no version information available) (analyzing indels and HDR by decomposition)(<a href="http://shinyapps.datacurators.nl/tider/">http://shinyapps.datacurators.nl/tider/</a>)</p> <p>CRISPResso2 (analyzing NGS result to evaluate HDR efficiency)(<a href="https://crispresso.pinellolab.partners.org/">https://crispresso.pinellolab.partners.org/</a>)</p> <p>FLOWJO software version 7.6 (FLOWJO)</p> <p>BZ-X Analyzer software version 1.0.0 (Keyence Corporation)</p> <p>ZEN 2010 software version 6.0.62 (Carl Zeiss MicroImaging GmbH)</p> <p>NDP.view 2 software (version 2.7.25, Hamamatsu)</p> |

For manuscripts utilizing custom algorithms or software that are central to the research but not yet described in published literature, software must be made available to editors and reviewers. We strongly encourage code deposition in a community repository (e.g. GitHub). See the Nature Portfolio [guidelines for submitting code & software](#) for further information.

## Data

Policy information about [availability of data](#)

All manuscripts must include a [data availability statement](#). This statement should provide the following information, where applicable:

- Accession codes, unique identifiers, or web links for publicly available datasets
- A description of any restrictions on data availability
- For clinical datasets or third party data, please ensure that the statement adheres to our [policy](#)

All data needed to evaluate the conclusions in the paper are present in the main text, and supplementary material. The source data for the Figures along with the Supplementary Figures presented in this paper are available in the Source Data file. DNA sequencing files can be accessed at the National Center for Biotechnology Information Sequence Read Archive (NCBI SRA) with accession code PRJNA1012742. All other relevant data that support all findings within this paper are available from the corresponding author upon request.

## Research involving human participants, their data, or biological material

Policy information about studies with [human participants or human data](#). See also policy information about [sex, gender \(identity/presentation\), and sexual orientation](#) and [race, ethnicity and racism](#).

|                                                                    |                 |
|--------------------------------------------------------------------|-----------------|
| Reporting on sex and gender                                        | Not applicable. |
| Reporting on race, ethnicity, or other socially relevant groupings | Not applicable. |
| Population characteristics                                         | Not applicable. |
| Recruitment                                                        | Not applicable. |
| Ethics oversight                                                   | Not applicable. |

Note that full information on the approval of the study protocol must also be provided in the manuscript.

## Field-specific reporting

Please select the one below that is the best fit for your research. If you are not sure, read the appropriate sections before making your selection.

Life sciences       Behavioural & social sciences       Ecological, evolutionary & environmental sciences

For a reference copy of the document with all sections, see [nature.com/documents/nr-reporting-summary-flat.pdf](https://www.nature.com/documents/nr-reporting-summary-flat.pdf)

## Life sciences study design

All studies must disclose on these points even when the disclosure is negative.

|                 |                                                                                                                                                                                                                                                                                                                                                                   |
|-----------------|-------------------------------------------------------------------------------------------------------------------------------------------------------------------------------------------------------------------------------------------------------------------------------------------------------------------------------------------------------------------|
| Sample size     | Sample sizes were determined using statistical power calculations. For various assays, we performed three to eight replicates to yield statistically significant differences.                                                                                                                                                                                     |
| Data exclusions | No data were excluded from the analyses.                                                                                                                                                                                                                                                                                                                          |
| Replication     | Data reported were consistently replicated between three to eight times across multiple experiments with all replicates generating similar results.                                                                                                                                                                                                               |
| Randomization   | For in vivo animal experiments, mice were randomly allocated into each group. For in vitro and ex vivo cell-based experiments, cells were cultured under tightly controlled conditions.                                                                                                                                                                           |
| Blinding        | Due to the proof-of-concept nature of this study, true blinding of experiments was not possible. However, data collection and analyses for some experiments were conducted by separate individuals. In some cases, these collectors/analyzers were not aware which samples corresponded to which experimental groups at the time of data collection and analysis. |

## Reporting for specific materials, systems and methods

We require information from authors about some types of materials, experimental systems and methods used in many studies. Here, indicate whether each material, system or method listed is relevant to your study. If you are not sure if a list item applies to your research, read the appropriate section before selecting a response.

## Materials &amp; experimental systems

|                                     |                                                                 |
|-------------------------------------|-----------------------------------------------------------------|
| n/a                                 | Involved in the study                                           |
| <input type="checkbox"/>            | <input checked="" type="checkbox"/> Antibodies                  |
| <input type="checkbox"/>            | <input checked="" type="checkbox"/> Eukaryotic cell lines       |
| <input checked="" type="checkbox"/> | <input type="checkbox"/> Palaeontology and archaeology          |
| <input type="checkbox"/>            | <input checked="" type="checkbox"/> Animals and other organisms |
| <input checked="" type="checkbox"/> | <input type="checkbox"/> Clinical data                          |
| <input checked="" type="checkbox"/> | <input type="checkbox"/> Dual use research of concern           |
| <input checked="" type="checkbox"/> | <input type="checkbox"/> Plants                                 |

## Methods

|                                     |                                                    |
|-------------------------------------|----------------------------------------------------|
| n/a                                 | Involved in the study                              |
| <input checked="" type="checkbox"/> | <input type="checkbox"/> ChIP-seq                  |
| <input type="checkbox"/>            | <input checked="" type="checkbox"/> Flow cytometry |
| <input checked="" type="checkbox"/> | <input type="checkbox"/> MRI-based neuroimaging    |

## Antibodies

## Antibodies used

Anti-p75 NGF Receptor antibody (ab8875) and Donkey Anti-Rabbit IgG H&L (Alexa Fluor® 647) (ab150075) was purchased from Abcam.  
 Anti-CFTR antibody (UNC 596) was purchased from University of North Carolina.  
 Anti-Actin antibody (MAB1501) was purchased from Millipore.  
 Anti-CD45 (Alexa fluor® 647)(#103124), Anti-EpCam (Alexa fluor® 647)(#324212) and Anti-CD31 (Pacific Blue)(#102422) were purchased from BioLegend.  
 IRDye 680RD Goat anti-Mouse IgG secondary antibody (926-68070) was purchased from LI-COR  
 PE-Cy7 anti-human CD271/NGFR (562122) was purchased from BD Biosciences

## Validation

The antibody was validated internally validated using positive and negative control samples.  
 Validation/citation data are also available on the manufacturer's websites or CiteAb's website:  
 Anti-p75 NGF Receptor antibody (ab8875), <https://www.citeab.com/antibodies/743864-ab8875-anti-p75-ngf-receptor-antibody?des=01b6c2b0e33ad8cf>  
 Donkey Anti-Rabbit IgG H&L (Alexa Fluor® 647) (ab150075): <https://www.abcam.com/products/secondary-antibodies/donkey-rabbit-igg-hl-alexa-fluor-647-ab150075.html?productWallTab=ShowAll>  
 Anti-Actin antibody (MAB1501), <https://www.sigmaaldrich.com/US/en/product/mm/mab1501>  
 Anti-CFTR antibody (UNC 596), <https://cftrantibodies.web.unc.edu/data-sheets/>  
 Anti-CD45 (Alexa fluor 647)(#103124), <https://www.biolegend.com/fr-fr/products/alexa-fluor-647-anti-mouse-cd45-antibody-3101>  
 Anti-EpCam (Alexa fluor® 647)(#324212), <https://www.biolegend.com/fr-ch/products/alexa-fluor-647-anti-human-cd326-epcam-antibody-3760>  
 Anti-CD31 (Pacific Blue)(#102422), <https://www.biolegend.com/en-us/products/pacific-blue-anti-mouse-cd31-antibody-6669?GroupID=BLG2420>  
 IRDye 680RD Goat anti-Mouse IgG secondary antibody (926-68070), <https://www.licor.com/bio/reagents/irdye-680rd-goat-anti-rabbit-igg-secondary-antibody>  
 PE-Cy7 anti-human CD271/NGFR (562122), <https://www.bdbiosciences.com/en-us/products/reagents/flow-cytometry-reagents/research-reagents/single-color-antibodies-ruo/pe-cy-7-mouse-anti-human-cd271.562122>

## Eukaryotic cell lines

Policy information about [cell lines and Sex and Gender in Research](#)

## Cell line source(s)

Hela cells were originally obtained from ATCC.  
 BFP/GFP HEK293 cells were obtained from the laboratory of Professor Jacob Corn (ETH Zurich).  
 Primary HBE cells were collected from transplanted lungs from a healthy donor who has wild-type CFTRwt/wt and an individual with cystic fibrosis who was homozygous for CFTR F508del/F508del. Primary HBE cells were provided by the Cystic Fibrosis Foundation Therapeutic Lab.

## Authentication

The cell lines were not further authenticated after receiving.

## Mycoplasma contamination

The cell lines were not tested for mycoplasma contamination.

Commonly misidentified lines  
(See [ICLAC](#) register)

HeLa and HEK293 derivative cells are listed as a possible contaminating cell line according to ICLAC database.

## Animals and other research organisms

Policy information about [studies involving animals; ARRIVE guidelines](#) recommended for reporting animal research, and [Sex and Gender in Research](#)

## Laboratory animals

C57BL/6 mice were obtained from the UTSW Mouse Breeding Core Facility. B6.Cg-Gt(ROSA)26Sortm9(CAGtdTomato)Hze/J mice (also known as Ai9 or Ai9(RCL-tdT) mice) and B6.Cg-Gt(ROSA)26Sortm14(CAG-tdTomato)Hze/J mice (also known as Ai14 or Ai14(RCL-tdT)-D mice) were obtained from The Jackson Laboratory (007909)(007914) and bred to maintain in the UTSW Animal Facility. Mice bearing with homozygous G542X mutation were created by breeding heterozygous males and females by Cystic Fibrosis Mouse Models Core at Case Western Reserve University. Mice were housed in a barrier facility with a 12 h light/dark cycle and maintained

on standard chow (2916 Teklad Global). The temperature range for the housing room is 22 °C and the humidity range is 35%-60% (average is around 50%).

Wild animals

The study did not involve the use of wild animals.

Reporting on sex

Both male and female mice were used. The sex of the animals was not further considered because LNP-mediated nucleic acid delivery data did not show bias toward one gender in experiments.

Field-collected samples

The study did not involve samples collected from the field.

Ethics oversight

C57BL/6 and Ai9/Ai14 mice experiments were approved by the Institution Animal Care and Use Committees of The University of Texas Southwestern Medical Center and were consistent with local, state, and federal guidelines as applicable. G542X mice experiment were approved by The Institutional Animal Care and Use Committee of Case Western Reserve University and were consistent with local, state, and federal guidance.

Note that full information on the approval of the study protocol must also be provided in the manuscript.

## Flow Cytometry

### Plots

Confirm that:

- The axis labels state the marker and fluorochrome used (e.g. CD4-FITC).
- The axis scales are clearly visible. Include numbers along axes only for bottom left plot of group (a 'group' is an analysis of identical markers).
- All plots are contour plots with outliers or pseudocolor plots.
- A numerical value for number of cells or percentage (with statistics) is provided.

### Methodology

Sample preparation

For lung basal cell editing experiment, Lung tissue was minced using A blade and transferred to an EP tube containing 250µL of 2xdigestion medium (90 units µL<sup>-1</sup> collagenase I, 50 units µL<sup>-1</sup> DNase I and 60 units µL<sup>-1</sup> hyaluronidase, 1% FBS) and homogenized with tissue grinder. Afterwards, tissue solution was transferred to a 15mL centrifuge tube containing 10mL of 2xdigestion medium and incubated at 37 °C for 1 hour with shaking. Next, the lung solution was filtered using a 70-µm filter and washed once with 1x PBS. A cell pellet was obtained by centrifuging 35 for 10min at a speed of 500xg at 4 °C. The supernatant was removed, and the cell pellet was resuspended in 2mL of 1xred blood cell lysis buffer (BioLegend, 420301) and incubated on ice for 5min. After incubation, 4mL of cell staining buffer (BioLegend) was added to stop red blood cell lysis. The solution was then centrifuged again at 500xg for 10min to obtain cell pellet. The single cells were resuspended in cell staining buffer to make cell solution at density of 1-5x10<sup>6</sup> cells mL<sup>-1</sup>. 100uL of cell solution was 40 transferred to a new EP tube to incubate with Anti-p75 NGF receptor antibody (1:100 dilution) for 30mins on ice, to stain lung basal cells. Afterwards, the cells were washed with 1x PBS buffer twice and incubated with Donkey Anti-Rabbit IgG H&L (Alexa Fluor® 647) (1:2000) for 30mins on ice, protecting from light (total volume 100 µL). The stained cells were washed twice with 1mL of 1x PBS, then resuspended in 500 µL 1x PBS for flow cytometry analysis using a LSRForessa SORP (version 45 8.0.1, BD Biosciences) in the Moody Foundation Flow Cytometry Facility. Ghost Dye Red 780 (TonboBiosciences, 13-0865-T500) was used to discriminate live cells.

For Cas9-mediated gene editing in TdTom reporter mice experiment, mouse lungs were resected; and the tissues were placed into ice cold PBS. The lung tissue was then cut into small pieces and transferred into a 50 mL tube containing 10mL of 1X lung digestion media 20 [RPMI dissociation medium (1:1 vol/vol) RPMI supplemented with 2% wt/vol BSA, 300 U/mL collagenase, 100 U/mL hyaluronidase]. The 50mL tube was then incubated at 37 °C for 1hr while shaking at 180 rpm. After incubation, the homogenized lung cell solution was pipetted up and down several times to remove cell clumps and finally filtered through a 70-micron cell strainer into a new 50 mL falcon tube. The filter was washed with 10mL wash buffer consisting of cold PBS and 2% fetal bovine serum (FBS). 25 The sample was then centrifuged at 1200 rpm for 5 minutes. The supernatant was removed, and the cell pellet was resuspended in 10ml of cold wash buffer. Next, the red blood cells were lysed by resuspending the cell pellet in 5mL of 1X RBC lysis buffer (BioLegend) at room temperature for 5 minutes. After 5 minutes, 10mL of wash media was added to the sample. The sample was centrifuged at 1200rpm for 5 minutes. Finally, the RBC free cell pellet was resuspended in 5mL of cell staining buffer (BioLegend) 30 and proceeded with antibody staining for flowcytometry. Single-cell suspensions obtained from the mouse lungs were pre-blocked with mouse Fc-receptor blocker (BioLegend) for 15 minutes. Subsequently cells were labeled with an Alexa fluor 488-conjugated anti mouse CD31, Pacific, blue-conjugated anti mouse CD45 and Alexa fluor 647-conjugated anti mouse EpCAM antibodies (all from BioLegend) by incubating 100µL of cell suspension 35 with antibodies for 15 minutes on ice. Ghost dye red (BioLegend) was used to identify the dead cells. Next, the cell pellet was washed 3-times with cell staining buffer to remove excess antibodies. Finally, the cell pellet was resuspended in 500µL of cold cell staining buffer and kept on ice until analysis by flow cytometer.

For staining of HBE, FACS buffer was prepared at a final concentration of 5mM EDTA (Invitrogen, 15575-038), 10µM Y-27632 (STEMCELL, 72302), 10% FBS in 1X DPBS. Resuspended each cell pellet in 100µL of FACS buffer with PE-Cy7 anti-human CD271/NGFR (BD, 562122) at 1:100 dilution. Cells were incubated for 20 minutes in the dark at 4 °C. The stained cells were washed twice with 1mL 1X DPBS, then resuspended in 500µL FACS buffer with SYTOX Blue (ThermoFisher, S34857) at 1:1000 dilution to discriminate live cells. The HBE cells were then analyzed using ThermoFisher Attune CytPix machine (ThermoFisher) and FlowJo software (BD Life Sciences) to assess the DOTAP10-tdTom uptake.

Instrument

BD FACSDiva software version 8.0.1 (BD LSRFortessa)

Software

FLOWJO software version 7.6 (FLOWJO)

Cell population abundance

Mouse lung cells were sorted based on cell surface marker NGFR expression (Alexa Fluor® 647)/EpCam (Alexa fluor 647)/CD45 (Pacific blue)/CD31 (Alexa fluor 488) followed by tdTomato tdTomato fluorescent protein expression using fluorescence-activated cell sorting (FACS) analysis. Purity of post-sort population was determined by FACS for Alexa Fluor® 647/Pacific, blue/Alexa fluor 488, then tdTomato.  
Human HBE cells were sorted based on cell surface marker NGFR expression (PE-Cy7 ) followed by tdTomato tdTomato fluorescent protein expression using fluorescence-activated cell sorting (FACS) analysis. Purity of post-sort population was determined by FACS for PE-Cy7, then tdTomato.

Gating strategy

FSC/SSC and viability gating using Ghost Red Dye were applied for the flow cytometry experiment. Gating based on tdtomato positivity was used to detect of in vivo edited (tdTOM+) cells.

Tick this box to confirm that a figure exemplifying the gating strategy is provided in the Supplementary Information.
